# Supplementary material
Source: PubMed Central journal article supplement (PMC8448037)
Supplement: NIHMS1720813-supplement-Supplementary_DC_1.pdf [file NIHMS1720813-supplement-Supplementary_DC_1.pdf]

**Supplemental Table SI.** Estimated geometric mean leukocyte telomere length and confidence intervals for minimally- and fully-adjusted models. *P* for trend are 2 sided.

| Age at Last Birth (years)             | N   | LTL Geometric Mean <sup>a</sup> | 95% Confidence Interval                            |
|---------------------------------------|-----|---------------------------------|----------------------------------------------------|
| Minimally-Adjusted Model <sup>b</sup> |     |                                 |                                                    |
| < 25                                  | 170 | 0.89                            | 0.82-0.96                                          |
| 25-29                                 | 300 | 0.91                            | 0.86-0.97                                          |
| 30-34                                 | 331 | 0.92                            | 0.87-0.96                                          |
| 35-39                                 | 289 | 0.93                            | 0.90-0.97                                          |
| ≥ 40                                  | 142 | 0.96                            | 0.88-1.05                                          |
|                                       |     |                                 | <i>P</i> <sub>trend</sub> <sup>d</sup> = 0.03      |
|                                       |     |                                 | <i>P</i> <sub>continuous</sub> <sup>e</sup> = 0.04 |
| Fully-Adjusted Model <sup>c</sup>     |     |                                 |                                                    |
| < 25                                  | 170 | 0.90                            | 0.84-0.97                                          |
| 25-29                                 | 300 | 0.93                            | 0.88-0.98                                          |
| 30-34                                 | 331 | 0.93                            | 0.88-0.98                                          |
| 35-39                                 | 289 | 0.95                            | 0.90-0.99                                          |
| ≥ 40                                  | 142 | 0.96                            | 0.88-1.05                                          |
|                                       |     |                                 | <i>P</i> <sub>trend</sub> <sup>d</sup> = 0.04      |
|                                       |     |                                 | <i>P</i> <sub>continuous</sub> <sup>e</sup> = 0.04 |

<sup>a</sup> LTL stands for leukocyte telomere length.

<sup>b</sup> Adjusted for age at blood collection and race/ethnicity.

<sup>c</sup> Adjusted for age at blood collection, race/ethnicity, number of live births, and history of hysterectomy and/or oophorectomy.

<sup>d</sup> *P*-value for age at last birth treated as an ordinal variable.

<sup>e</sup> *P*-value for age at last birth treated as a continuous variable.
